# Supplementary material for: B cell depletion therapy does not resolve chronic active multiple sclerosis lesions
Source: PubMed Central journal article supplement — eBioMedicine. 2023 Jul 10;94:104701. doi: 10.1016/j.ebiom.2023.104701 (PMC10436266; doi:10.1016/j.ebiom.2023.104701), 2023-07-10
Supplement: mmc1.pdf [file mmc1.pdf]

Supplementary Table 1. Whole-brain 3D segmented (multi-shot) echo-planar (EPI) sequence parameters for all the scanners implemented in the study.

| Scanner                          | Siemens Skyra | Philips Intera | Philips Ingenia | Philips Ingenia CX | GE Premier |
|----------------------------------|---------------|----------------|-----------------|--------------------|------------|
| Field strength                   | 3T            | 3T             | 3T              | 3T                 | 3T         |
| Site                             | NIH           | NIH            | Erasme          | JHU                | CUSL       |
| Receive channels                 | 32            | 8              | 16              | 32                 | 48         |
| Imaging plane                    | Sagittal      | Sagittal       | Sagittal        | Sagittal           | Sagittal   |
| Imaging resolution in plane (mm) | 0.65          | 0.55           | 0.55            | 0.65               | 0.67       |
| Slice thickness (mm)             | 0.65          | 0.55           | 0.55            | 0.65               | 0.67       |
| # slices                         | 256           | 336            | 336             | 256                | 355        |
| Repetition time (TR, ms)         | 64            | 53             | 53              | 66                 | 80.2       |
| Echo time (TE, ms)               | 35            | 29             | 29              | 35                 | 35         |
| Flip angle (deg)                 | 10°           | 10°            | 10°             | 10°                | 18°        |
| Acquisition time (min:sec)       | 5:46          | 4:40           | 4:40            | 5:04               | 4:18       |

Site abbreviations:

NIH: National Institutes of Health, Clinical Center (Bethesda, MD, USA)

Erasme: Erasme University Hospital (Brussels, Belgium)

JHU: Johns Hopkins University Hospital (Baltimore, MD, USA)

CUSL: Saint-Luc University Hospital (Brussels, Belgium)
