# Supplementary material for: B cell depletion therapy does not resolve chronic active multiple sclerosis lesions
Source: PubMed Central journal article supplement — eBioMedicine. 2023 Jul 10;94:104701. doi: 10.1016/j.ebiom.2023.104701 (PMC10436266; doi:10.1016/j.ebiom.2023.104701), 2023-07-10
Supplement: mmc2.pdf [file mmc2.pdf]

**Supplementary Table 2. Whole-brain 3D Magnetization-prepared 2 Rapid Gradient-Echo (MP2RAGE)**

| Scanner                              | Siemens<br>Skyra | GE<br>Premier |
|--------------------------------------|------------------|---------------|
| Field strength                       | 3T               | 3T            |
| Site                                 | NIH              | CUSL          |
| Receive channels                     | 32               | 48            |
| Imaging plane                        | Sagittal         | Sagittal      |
| Imaging resolution in plane (mm)     | 1.00             | 1.00          |
| Slice thickness (mm)                 | 1.00             | 1.00          |
| # slices                             | 176              | 156           |
| Repetition time (TR, ms)             | 5000             | 5000          |
| Echo time (TE, ms)                   | 2.9              | 3.0           |
| Inversion-time (TI, ms) <sub>1</sub> | 700              | 700           |
| Inversion-time (TI, ms) <sub>2</sub> | 2500             | 2500          |
| Flip angle (FA, deg) <sub>1</sub>    | 4°               | 7°            |
| Flip angle (FA, deg) <sub>2</sub>    | 5°               | 5°            |
| Acquisition time (min:sec)           | 8:22             | 8:25          |

Site abbreviations:

NIH: National Institutes of Health, Clinical Center (Bethesda, MD, USA)

CUSL: Saint-Luc University Hospital (Brussels, Belgium)
