# Supplementary material for: B cell depletion therapy does not resolve chronic active multiple sclerosis lesions
Source: PubMed Central journal article supplement — eBioMedicine. 2023 Jul 10;94:104701. doi: 10.1016/j.ebiom.2023.104701 (PMC10436266; doi:10.1016/j.ebiom.2023.104701), 2023-07-10
Supplement: mmc4.pdf [file mmc4.pdf]

**Supplementary Table 4. MS cohort characteristics by treatment category and gender**

| Treatment category                                   | Treated with anti-CD20 monoclonal antibody |                                     | Untreated                       |                                     |
|------------------------------------------------------|--------------------------------------------|-------------------------------------|---------------------------------|-------------------------------------|
|                                                      | male                                       | female                              | male                            | female                              |
| #                                                    | 23/46 (50%)                                | 23/46 (50%)                         | 5/26 (19%)                      | 21/26 (81%)                         |
| Demographic and clinical characteristics             |                                            |                                     |                                 |                                     |
| Clinical phenotype                                   | RRMS 7 (30%)<br>PMS 16 (70%)               | RRMS10 (44%)<br>PMS 13 (56%)        | RRMS 2 (40%)<br>PMS 3 (60%)     | RRMS 8 (38%)<br>PMS 13 (62%)        |
| Mean age, years (SD)                                 | 41 (±11)                                   | 44 (±11)                            | 57 (±10)                        | 50 (±9)                             |
| Mean disease duration, years (SD)                    | 8 (±8)                                     | 12 (±9)                             | 11 (±13)                        | 16 (±10)                            |
| # patients with previous DMT <sup>&amp;</sup>        | 13/23 (57%)                                | 15/23 (65%)                         | 3/5 (60%)                       | 11/26 (42%)                         |
| Median EDSS at baseline (range)                      | RRMS 2.5 (4.5-0)<br>PMS 5 (8-2)            | RRMS 1.5 (5.5-0)<br>PMS 5.5 (6.5-2) | RRMS 1 (6.5-0)<br>PMS 3.5 (6-3) | RRMS 1.5 (3-0)<br>PMS 5 (7-2.5)     |
| Median EDSS last-MRI fu. (range)                     | RRMS 3 (5-0)<br>PMS 6 (8-1.5)              | RRMS 1.5 (5.5-0)<br>PMS 5.5 (8-2.5) | RRMS 6 (6.5-0)<br>PMS 3 (6-0)   | RRMS 1.5 (3.5-0)<br>PMS 5 (6.5-1.5) |
| # patients with PIRA                                 | 7/23 (30%)                                 | 2/23 (9%)                           | 1/5 (20%)                       | 1/21(5%)                            |
| Mean follow-up time, months (range) <sup>§</sup>     | 23 (8-40)                                  | 22 (11-38)                          | 32 (10-83)                      | 30 (6-69)                           |
| Mean number of treatment infusions (SD) <sup>α</sup> | 4 (±1)                                     | 4 (±1)                              | -                               | -                                   |
| # patients with ≥1 PRL (%)                           | 21/23 (91%)                                | 15/23 (65%)                         | 4/5 (80%)                       | 7/21 (33%)                          |

<sup>α</sup> Mean number of treatment infusions: the first 2 infusion (normally 15 days apart) were counted as 1.

<sup>§</sup>Average post-treatment (for anti-CD20 treated patients) or post baseline MRI acquisition (for untreated patients) follow-up time.

<sup>&</sup> Number of patients having received another DMT before inclusion in the study (e.g. before the baseline MRI acquisition).

*Abbreviations:* RRMS: relapsing-remitting MS; PMS: progressive MS (including primary and secondary progressive MS patients); DMT: disease modifying treatment; EDSS: Expanded Disability Status Scale; MRI: magnetic resonance imaging; PIRA: progression independent of relapse activity; PRL: paramagnetic rim lesion; QSM: quantitative susceptibility mapping; SD: standard deviation.
