# Supplementary material for: B cell depletion therapy does not resolve chronic active multiple sclerosis lesions
Source: PubMed Central journal article supplement — eBioMedicine. 2023 Jul 10;94:104701. doi: 10.1016/j.ebiom.2023.104701 (PMC10436266; doi:10.1016/j.ebiom.2023.104701), 2023-07-10

## T-cell depletion

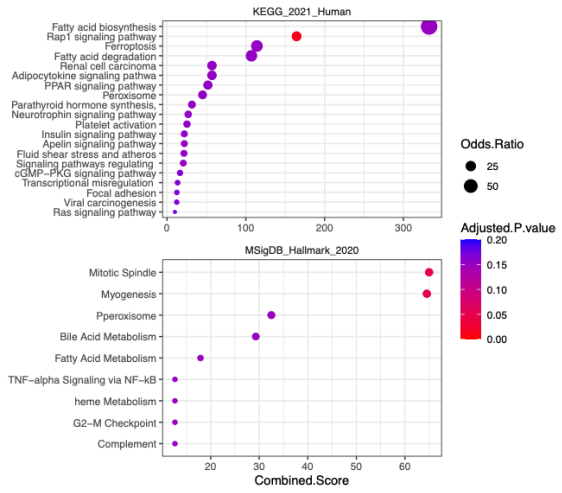

## CD8 T-cell depletion

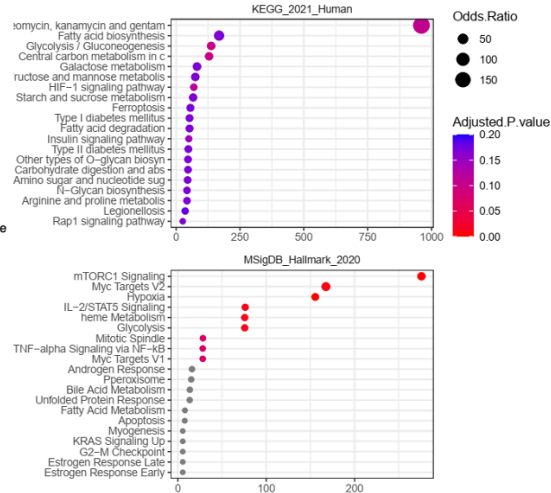

## CD4 T-cell depletion

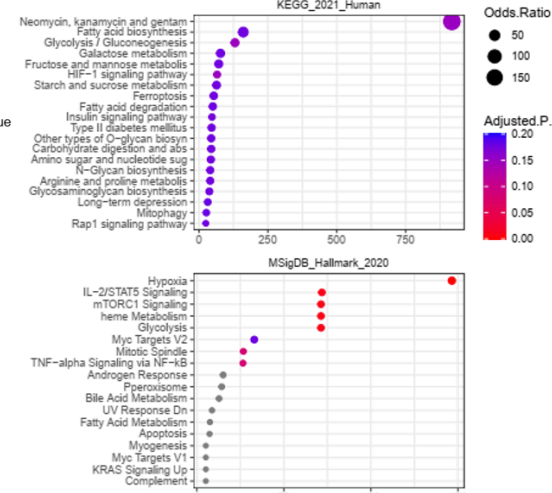

## dn T-cell depletion

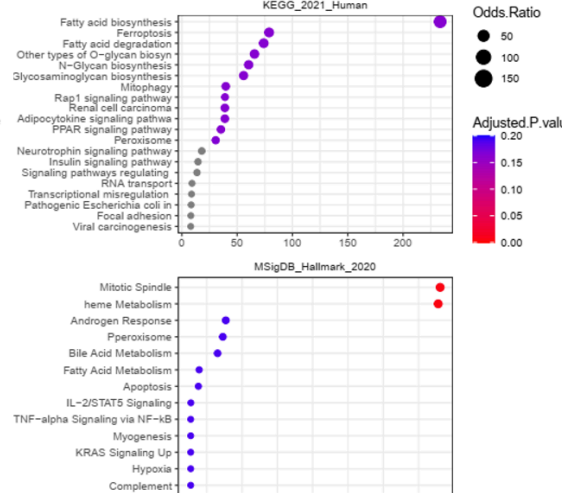

## CD20 B-cell depletion

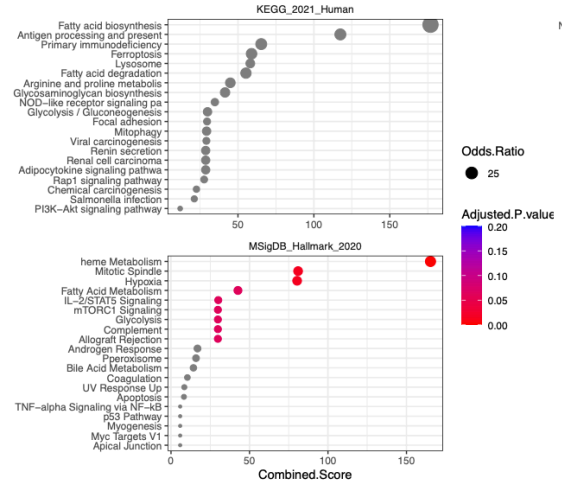

## Plasmablast depletion

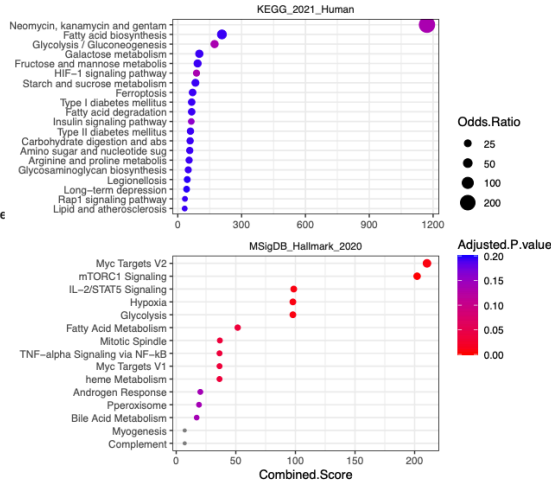

## BTK in silico KO

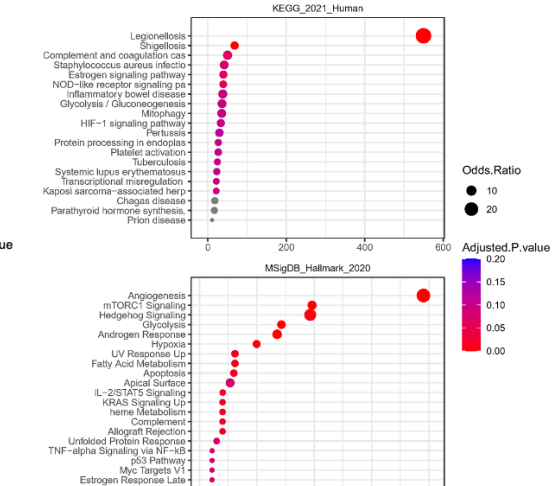

Supplement: mmc6.pdf [file mmc6.pdf]
