# Supplementary material for: B cell depletion therapy does not resolve chronic active multiple sclerosis lesions
Source: PubMed Central journal article supplement — eBioMedicine. 2023 Jul 10;94:104701. doi: 10.1016/j.ebiom.2023.104701 (PMC10436266; doi:10.1016/j.ebiom.2023.104701), 2023-07-10

a. Baseline sagittal susceptibility MRI showing a Paramagnetic rim lesion (PRL)

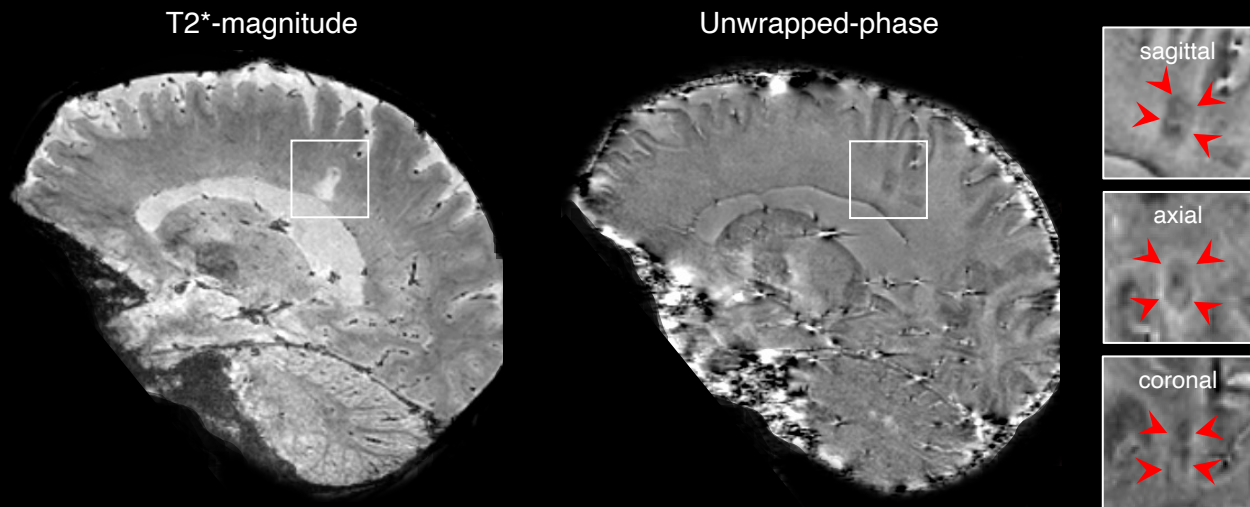

b. The paramagnetic rim disappeared over the 63 months MRI follow-up

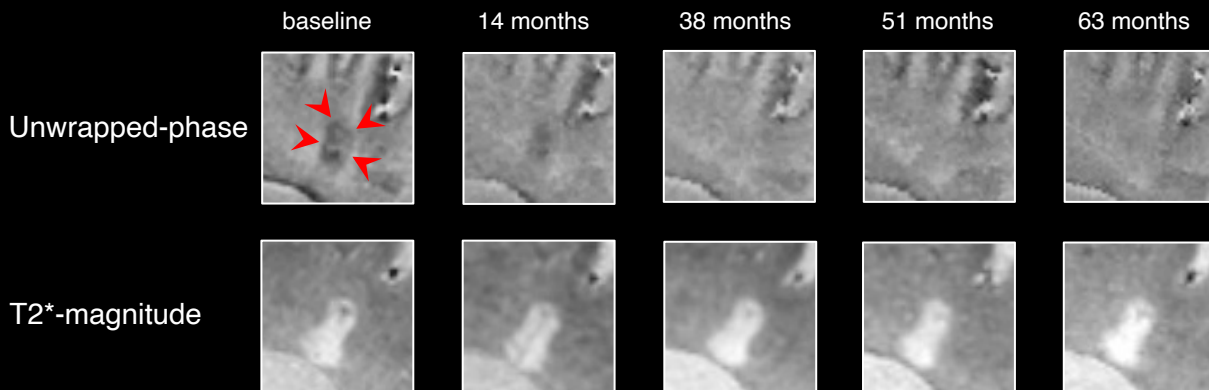

Supplement: mmc7.pdf [file mmc7.pdf]
