# Supplementary figures and images for: B cell depletion therapy does not resolve chronic active multiple sclerosis lesions
Source: PubMed Central journal article supplement — eBioMedicine. 2023 Jul 10;94:104701. doi: 10.1016/j.ebiom.2023.104701 (PMC10436266; doi:10.1016/j.ebiom.2023.104701), 2023-07-10

**a**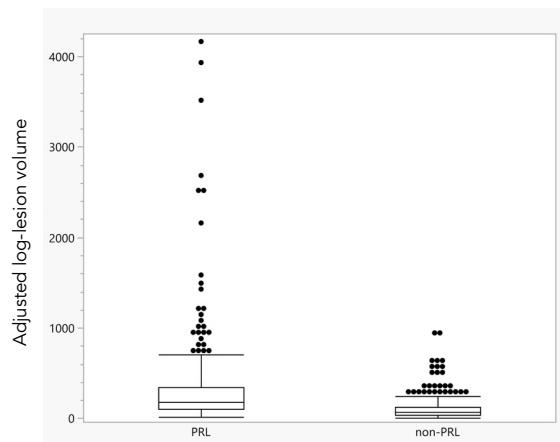**b**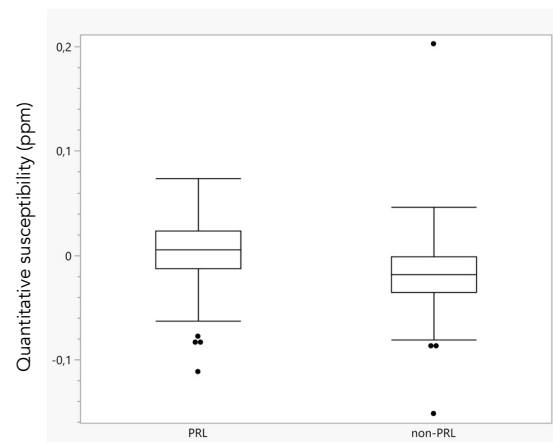**c**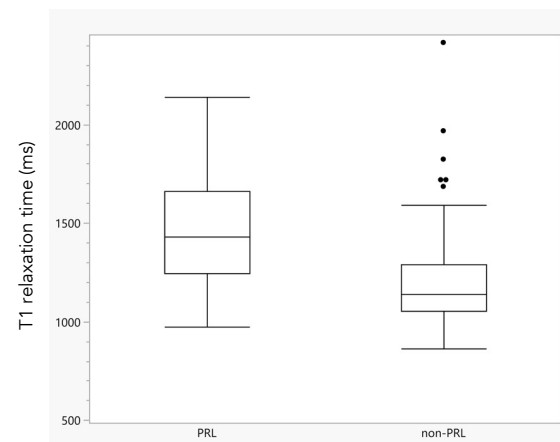**d**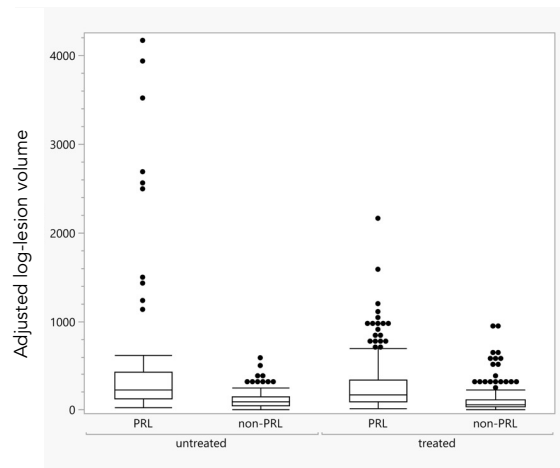**e**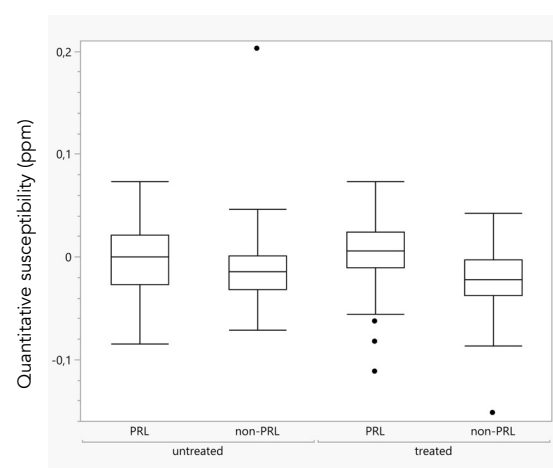**f**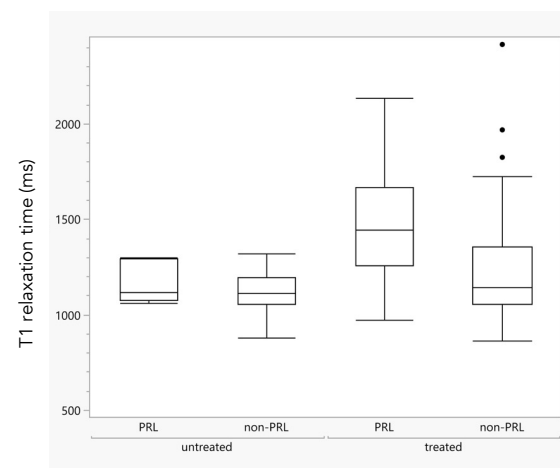

Supplement: mmc8.pdf [file mmc8.pdf]

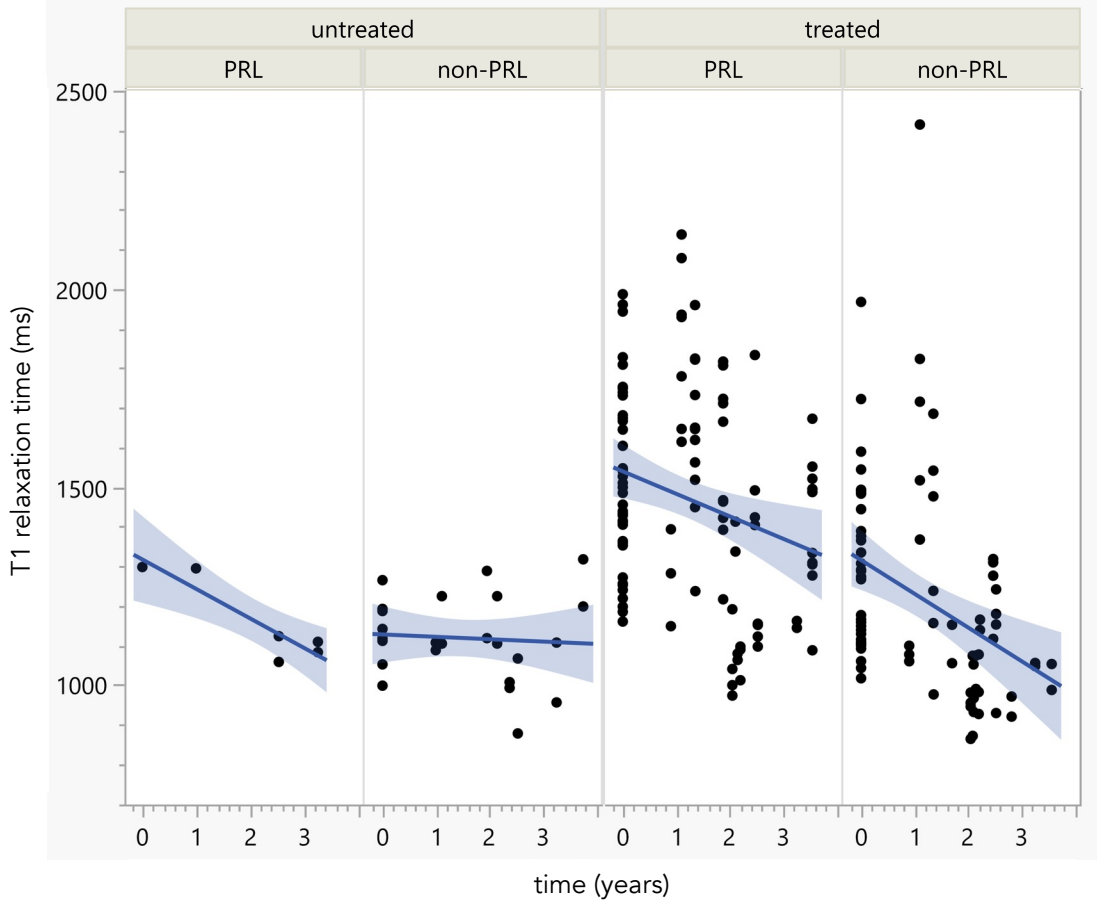

Supplement: mmc9.pdf [file mmc9.pdf]
